# Supplementary material for: HILPS, a long noncoding RNA essential for global oxygen sensing in humans
Source: PubMed Central journal article supplement — Sci Adv. 2023 Nov 22;9(47):eadi1867. doi: 10.1126/sciadv.adi1867 (PMC10664984; doi:10.1126/sciadv.adi1867), 2023-11-22
Supplement: sciadv.adi1867_sm.pdf [file sciadv.adi1867_sm.pdf]

Supplementary Materials for  
***HILPS*, a long noncoding RNA essential for global oxygen sensing in  
humans**

Zhi Chen *et al.*

Corresponding author: Hudan Liu, [hudanliu@whu.edu.cn](mailto:hudanliu@whu.edu.cn); Bing Zhao, [bingzhao@fudan.edu.cn](mailto:bingzhao@fudan.edu.cn);  
Guoliang Qing, [qingguoliang@whu.edu.cn](mailto:qingguoliang@whu.edu.cn)

*Sci. Adv.* **9**, eadi1867 (2023)  
DOI: 10.1126/sciadv.adi1867

**This PDF file includes:**

Figs. S1 to S7  
Tables S1 and S2

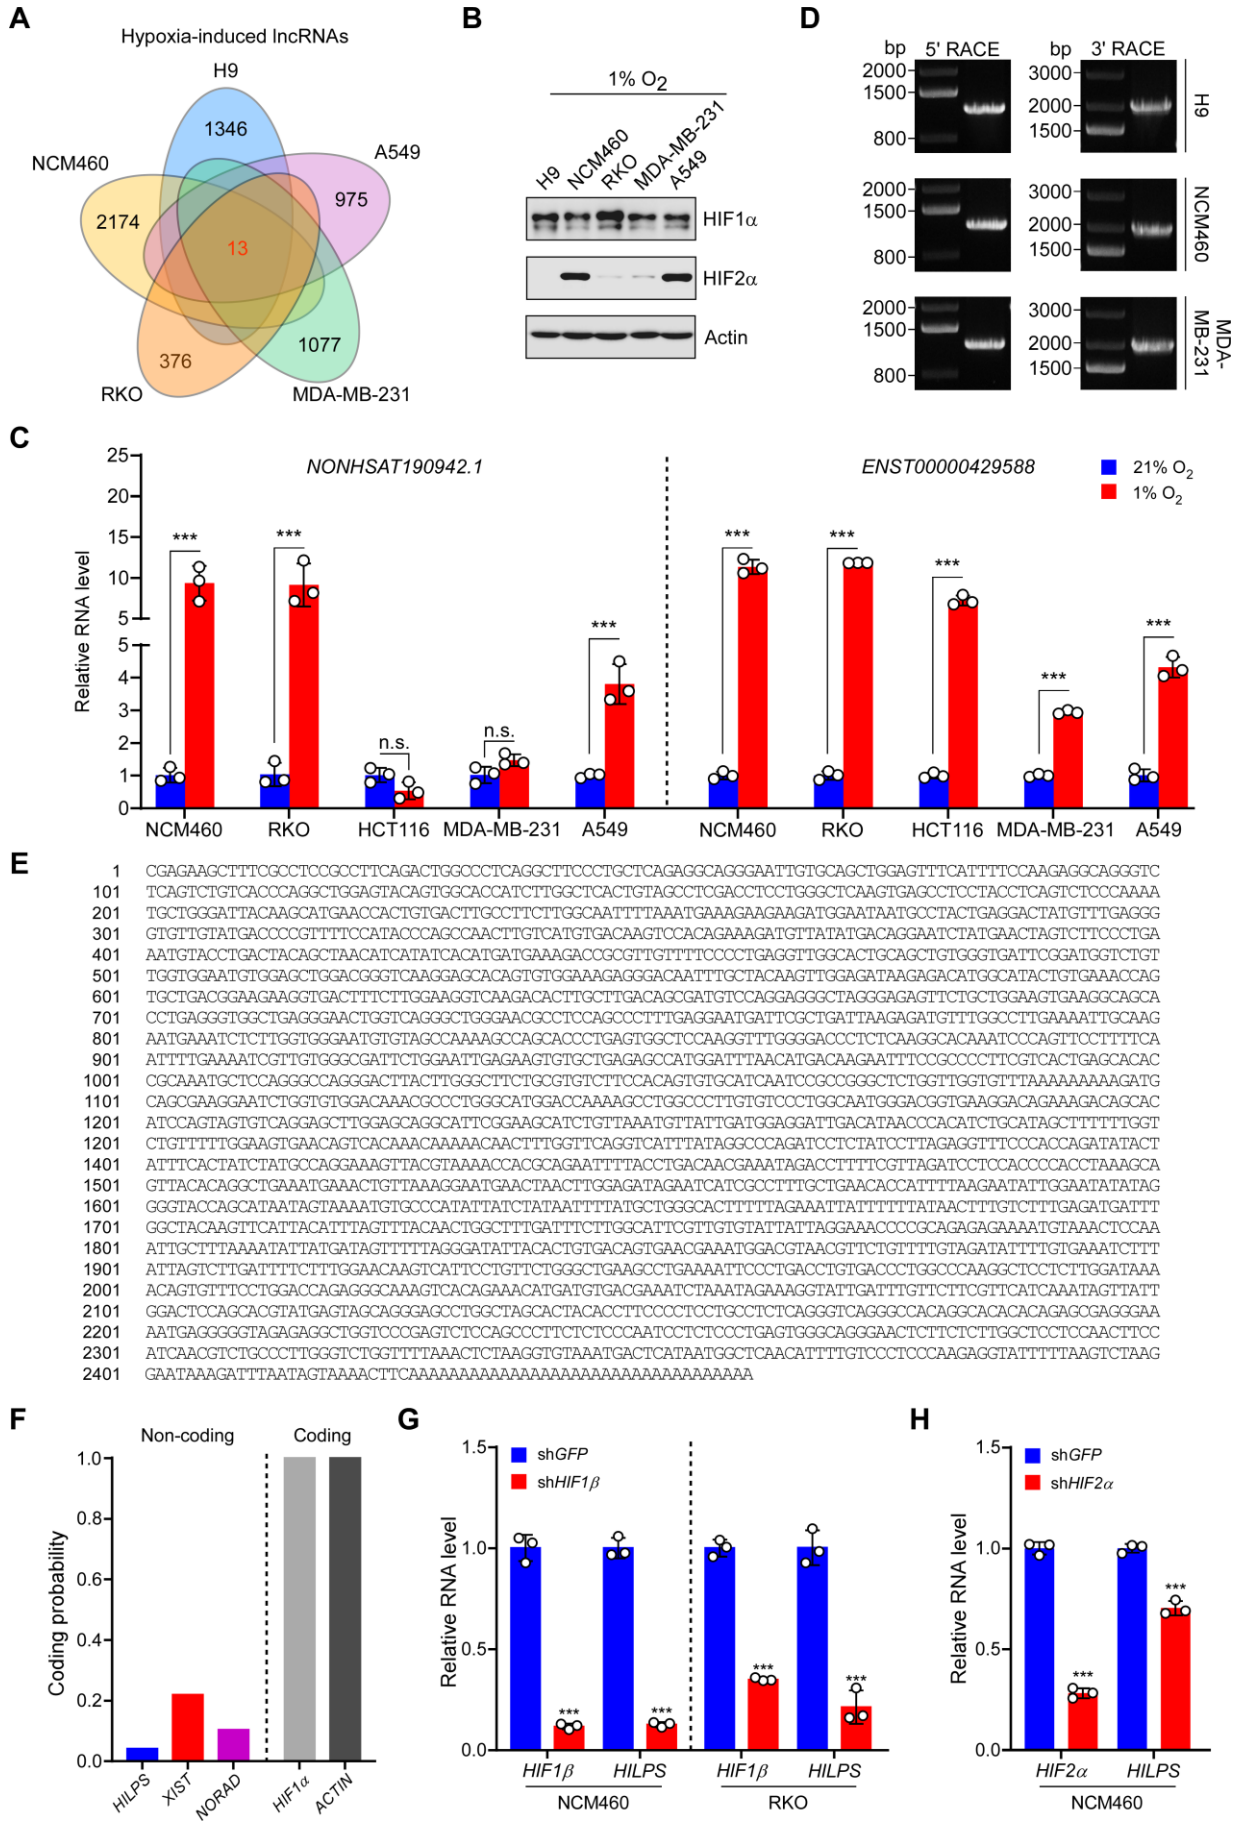

**Figure S1. *HILPS* is a long non-coding RNA regulated by hypoxia-inducible factors, related to Figure 1.**

(A) Venn diagram of overlapping lncRNAs induced by hypoxia (1% O<sub>2</sub>) in H9, NCM460, RKO, MDA-MB-231 and A549 cells.

(B) Immunoblots of HIF1 $\alpha$  and HIF2 $\alpha$  in H9, NCM460, RKO, MDA-MB-231 and A549 cells exposed to 1% O<sub>2</sub> for 24 h.

(C) qPCR analysis of *NONHSAT190942.1* and *ENST00000429588* in various cells exposed to 21% or 1% O<sub>2</sub> for 24 h.

(D) 5' and 3' RACE amplicons of *HILPS* using total RNA isolated from H9, NCM460 and MDA-MB-231 cells exposed to 1% O<sub>2</sub> for 24 h as a template. nt, nucleotide; bp, base pair.

(E) The nucleotide sequence of *HILPS* identified by 5' and 3' RACE in RKO cells, which has been deposited in the GenBank with the accession number OQ550038.

(F) Coding probability of *HILPS* as well as other known coding and non-coding RNAs determined by Coding Potential Calculator 2 (<http://cpc2.gao-lab.org/>).

(G) qPCR analysis of *HILPS* in *HIF1 $\beta$* -depleted NCM460 and RKO cells exposed to 1% O<sub>2</sub> for 24 h.

(H) qPCR analysis of *HILPS* in *HIF2 $\alpha$* -depleted NCM460 cells exposed to 1% O<sub>2</sub> for 24 h.

Data shown are mean  $\pm$  SD from biological triplicates. \* $p < 0.05$ , \*\* $p < 0.01$ , \*\*\* $p < 0.001$ , n.s., no significance, unpaired two-tailed Student's t test.

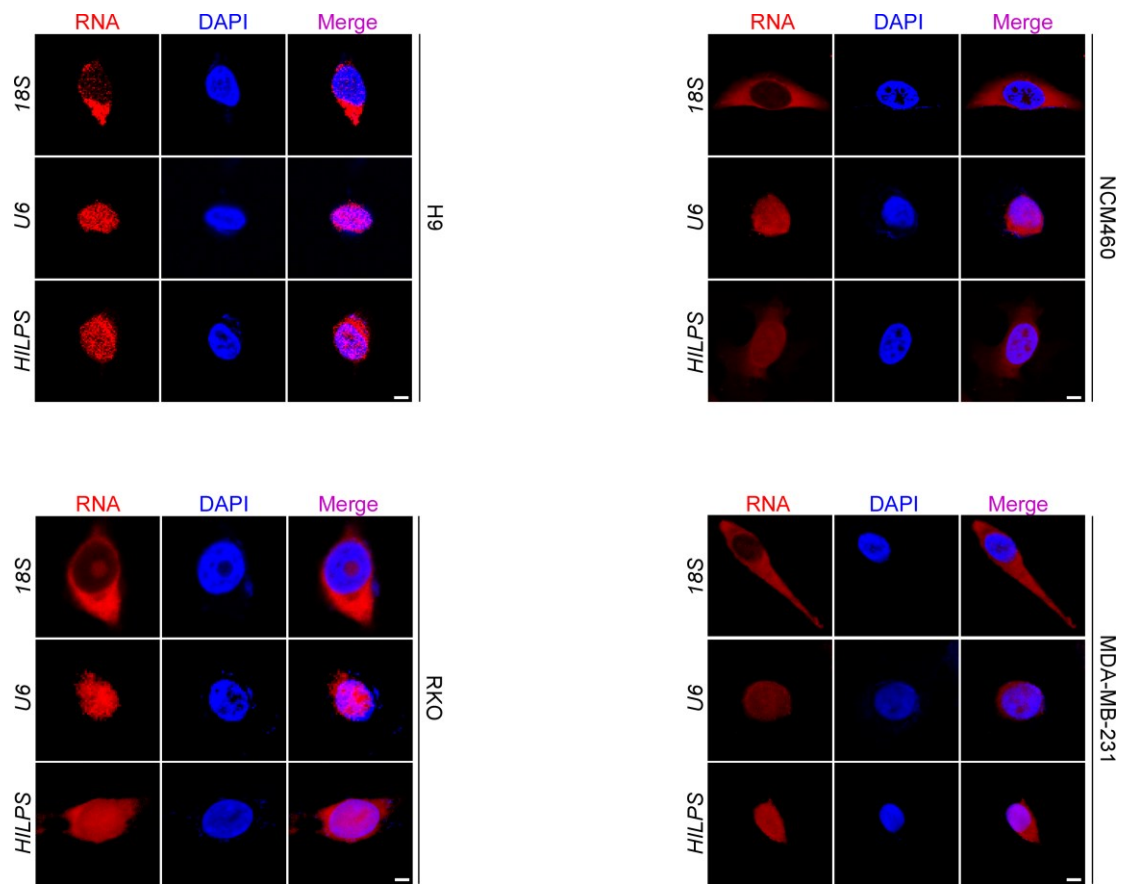

**Figure S2. Subcellular localization of *HILPS* detected by FISH in H9, NCM460, RKO and MDA-MB-231 cells, related to Figure 1. Scale bar, 10  $\mu$ m.**

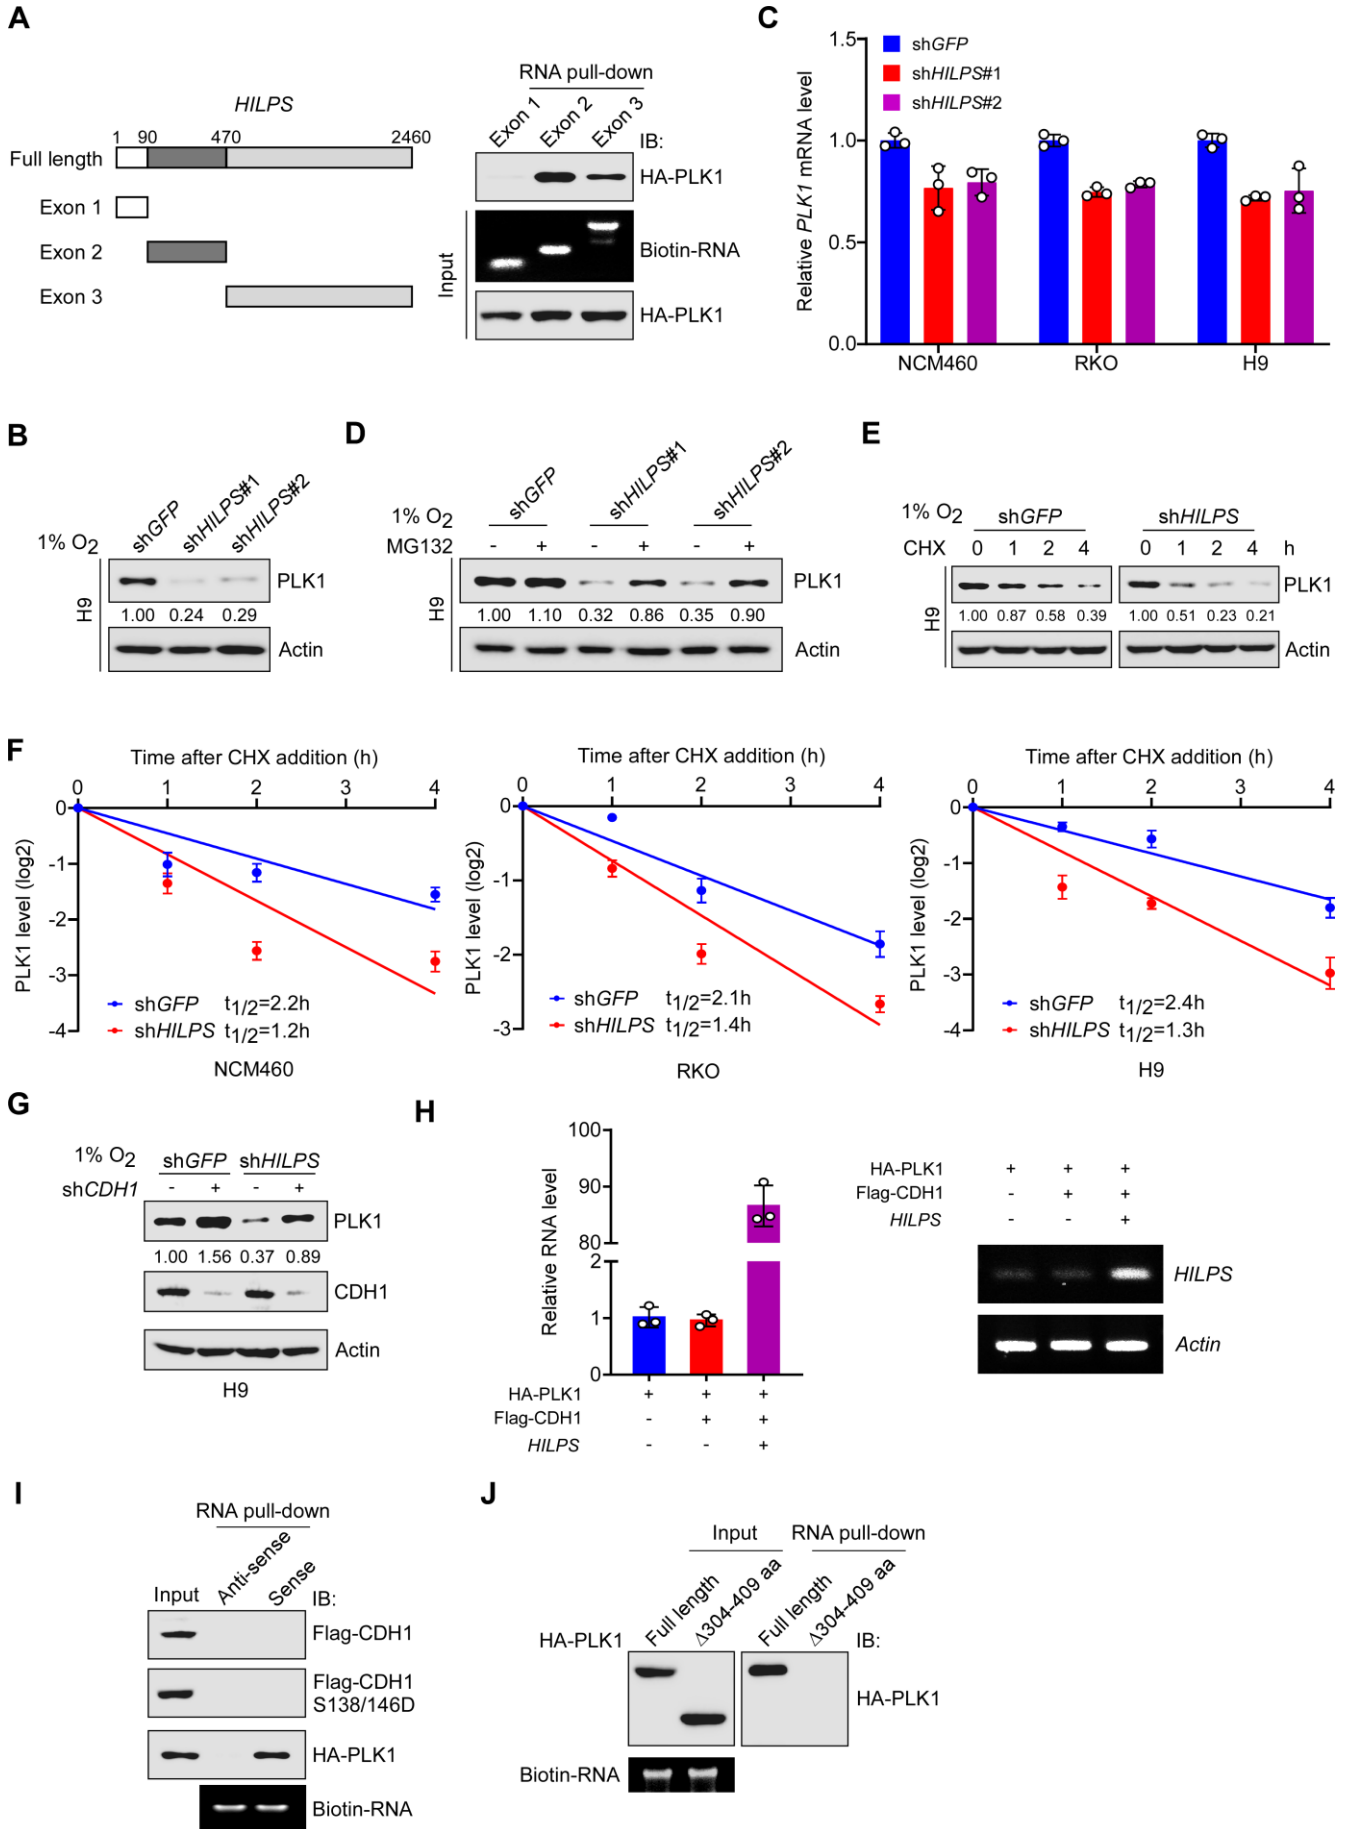

**Figure S3. *HILPS* binds to and stabilizes PLK1, related to Figure 4.**

(A) Schematic presentation of *HILPS* exons used in biotin-labeled RNA pull-down assay (left). Immunoblots of PLK1 from biotin-labeled *HILPS* exon pull-down assay using 293T cell lysates with HA-PLK1 expression (right).

(B) Immunoblots of PLK1 in *HILPS*-depleted H9 cells exposed to 1% O<sub>2</sub>. Actin is shown as a loading control.

(C) qPCR analysis of *PLK1* mRNA expression in *HILPS*-depleted NCM460, RKO and H9 cells exposed to 1% O<sub>2</sub>.

(D) Immunoblots of PLK1 in *HILPS*-depleted H9 cells treated with MG132 (10 μM) for 6 h before harvest. Cells were cultured in 1% O<sub>2</sub>.

(E) Time-course analysis of PLK1 degradation. *HILPS*-depleted H9 cells were cultured in 1% O<sub>2</sub>, treated with cycloheximide (CHX, 100 μg/mL) and harvested at the indicated time points followed by immunoblotting of PLK1.

(F) Quantification of PLK1 protein degradation. PLK1 band density was normalized to Actin and relative to t = 0 control.

(G) Immunoblots of PLK1 and CDH1 in 1% O<sub>2</sub>-cultured H9 cells expressing shRNA targeting *HILPS* and/or *CDH1*.

(H) qPCR analysis (left) and PCR amplicons (right) of *HILPS* in 293T cells expressing HA-PLK1, Flag-CDH1, and/or *HILPS* as indicated.

(I) RNA pull-down assay using biotin-labeled *HILPS* and lysates from 293T cells expressing Flag-CDH1, Flag-CDH1 mutant (S138/146D) or HA-PLK1.

(J) RNA pull-down assay using biotin-labeled *HILPS* and lysates from 293T cells expressing full-length HA-PLK1 or HA-PLK1 with amino acids 304-409 depletion.

Data shown are mean ± SD from biological triplicates.

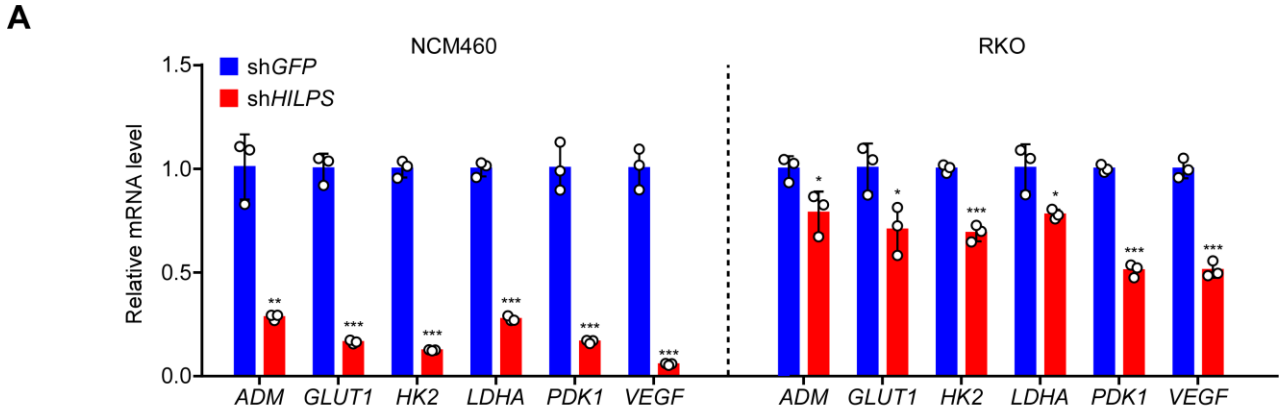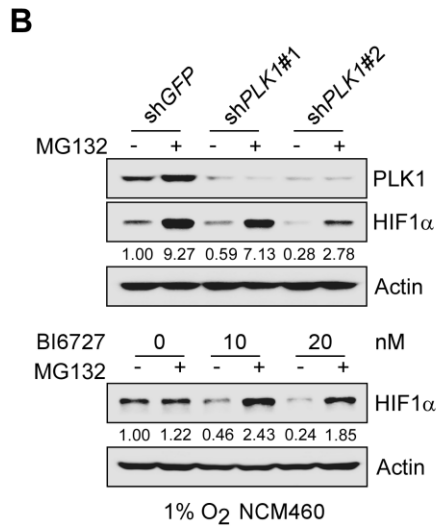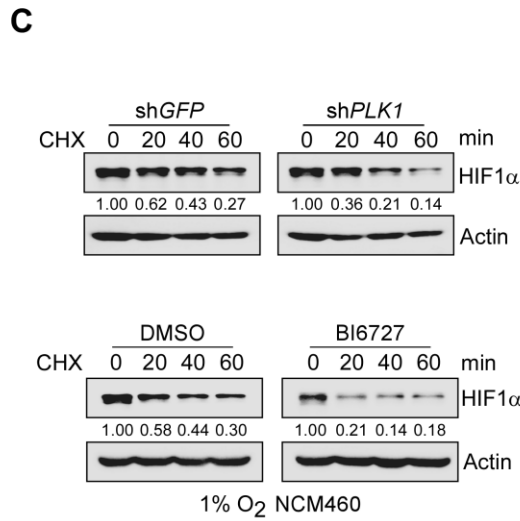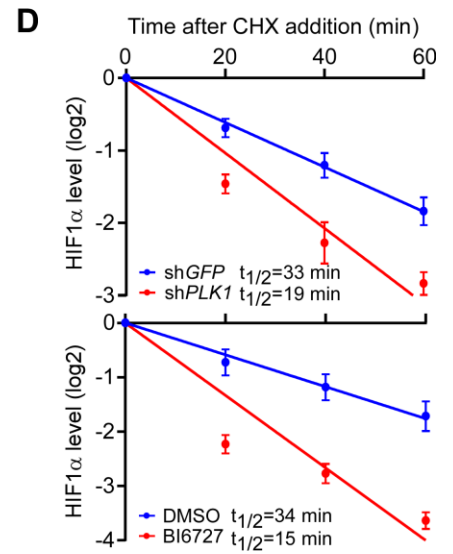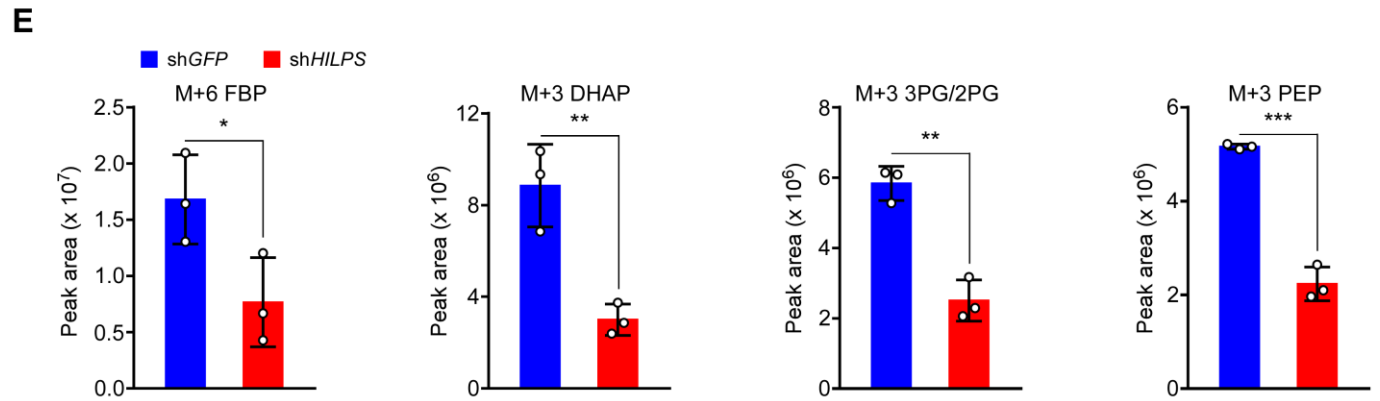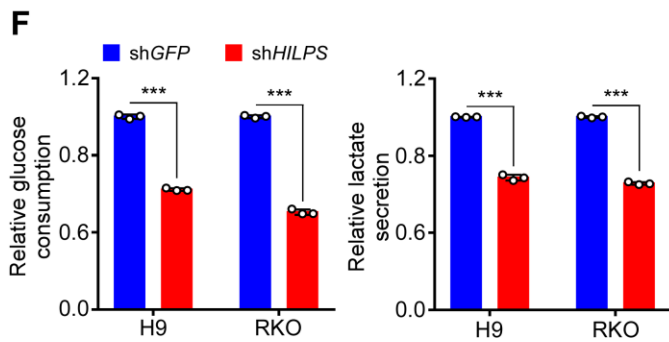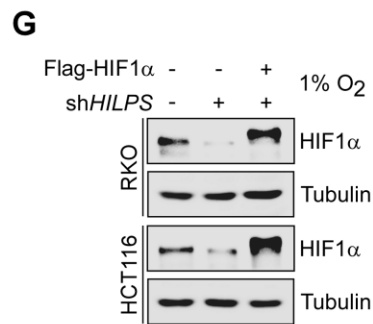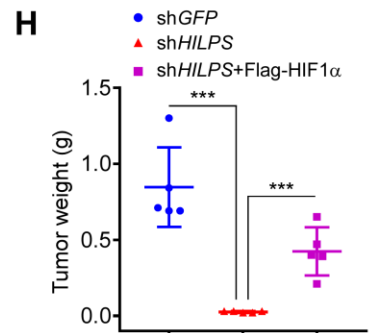

**Figure S4. PLK1 mediates *HILPS* regulation of HIF1 $\alpha$ , related to Figure 5.**

(A) qPCR analysis of representative HIF1 $\alpha$  target genes in *HILPS*-depleted NCM460 and RKO cells exposed to 1% O<sub>2</sub>.

(B) Immunoblots of HIF1 $\alpha$  and PLK1 in *PLK1*-depleted (upper) or PLK1 kinase inhibitor BI6727-treated (bottom) NCM460 cells exposed to 1% O<sub>2</sub>. MG132 (10  $\mu$ M) was added to cell culture for 6 h before harvest.

(C and D) Time-course analysis of HIF1 $\alpha$  degradation in *PLK1*-depleted (upper) or BI6727-treated (bottom) NCM460 cells subjected to 1% O<sub>2</sub> exposure. HIF1 $\alpha$  was analyzed by immunoblotting (C) and quantified as shown (D). HIF1 $\alpha$  band density was normalized to Actin and relative to t = 0 control.

(E) Analysis of isotope-labeled glycolysis intermediates in *HILPS*-depleted cells labeled with <sup>13</sup>C<sub>6</sub> glucose for 4 h during hypoxia culture (1% O<sub>2</sub>). Peak area represents the abundance of labeled metabolites, normalized to the total protein. FBP: fructose-1,6-bisphosphate, DHAP: dihydroxyacetone phosphate, 3PG/2PG: 3-phosphoglycerate/2-phosphoglycerate, PEP: phosphoenolpyruvate.

(F) Assessment of glucose consumption (left) and lactate secretion (right) in *HILPS*-depleted H9 and RKO cells cultured in 1% O<sub>2</sub> for 24 h.

(G) Immunoblots of HIF1 $\alpha$  in *HILPS*-depleted RKO and HCT116 cells with or without Flag-HIF1 $\alpha$  overexpression.

(H) Tumor weight quantifications of *HILPS*-depleted HCT116 xenografts with or without ectopic expression of HIF1 $\alpha$  (n=5).

Data shown are mean  $\pm$  SD from biological triplicates. \* $p$  < 0.05, \*\* $p$  < 0.01, \*\*\* $p$  < 0.001, n.s., no significance, unpaired two-tailed Student's t test (A, E, and F) and one-way ANOVA (H).



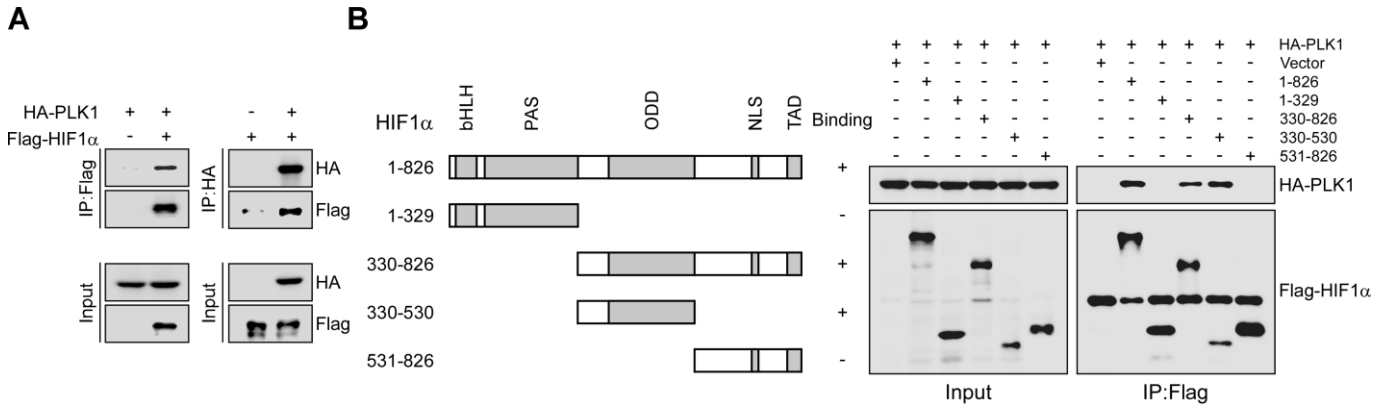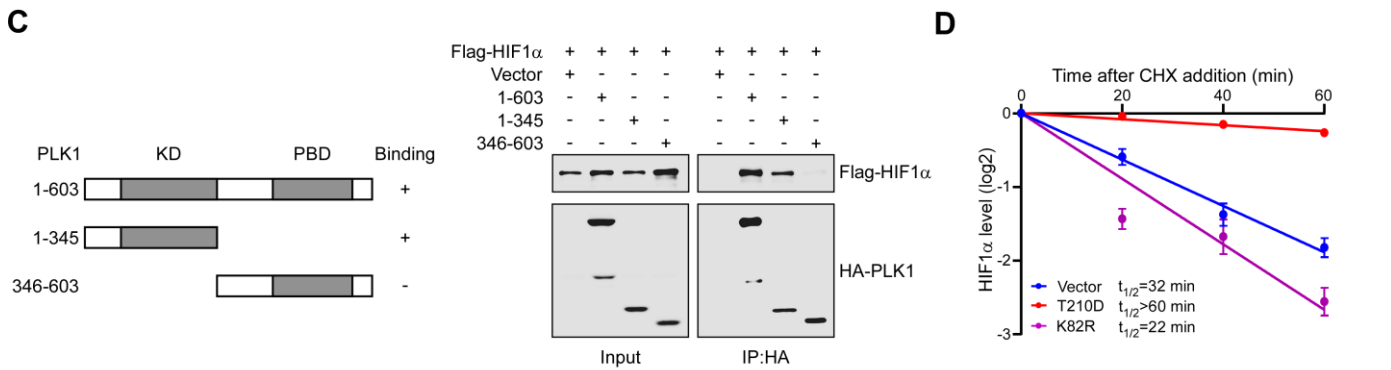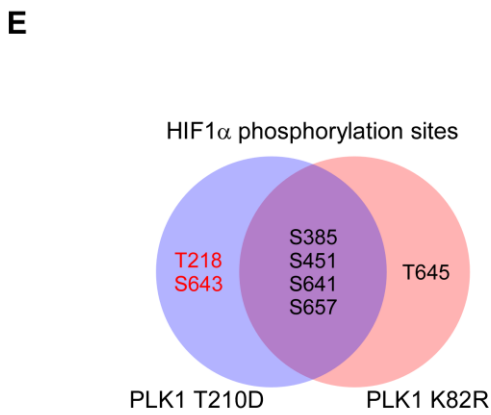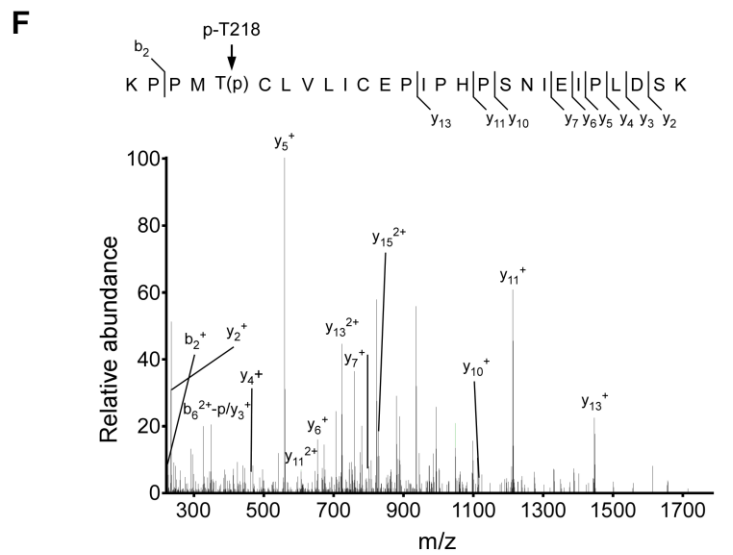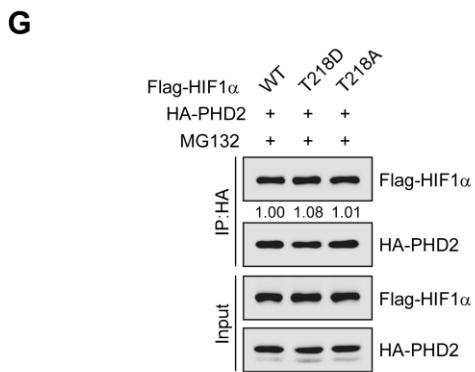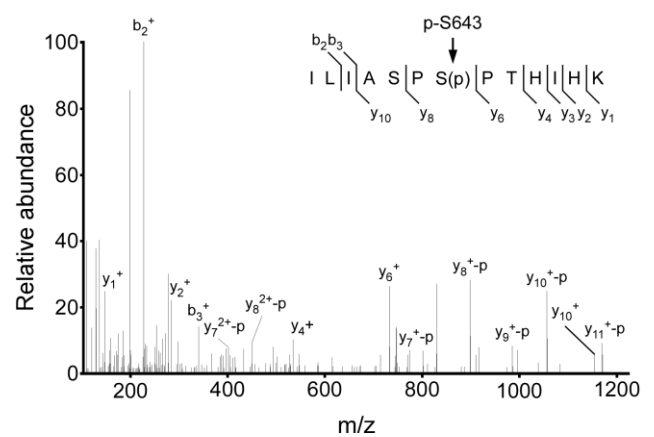

**Figure S5. PLK1 phosphorylates HIF1 $\alpha$  T218 and enhances HIF1 $\alpha$  stability, related to Figure 6.**

(A) Co-IP of exogenous HIF1 $\alpha$  and PLK1 using lysates of 293T cells overexpressing epitope-tagged proteins.

(B) Schematic presentation of various human HIF1 $\alpha$  truncations used in PLK1-binding assays (left). Co-IP using lysates of 293T cells overexpressing HA-PLK1 and/or various Flag-HIF1 $\alpha$  truncations (right).

(C) Schematic presentation of various human PLK1 truncations used in HIF1 $\alpha$ -binding assays (left). Co-IP using lysates of 293T cells overexpressing Flag-HIF1 $\alpha$  and/or various HA-PLK1 truncations (right).

(D) Quantification of HIF1 $\alpha$  protein degradation. HIF1 $\alpha$  band density was normalized to Actin and relative to t = 0 control.

(E) Venn diagram of mass spectrometry analysis for HIF1 $\alpha$  phosphorylation sites modified by PLK1 T210D or K82R.

(F) Mass spectrometry spectrum data mapping the HIF1 $\alpha$  T218 and S643 phosphorylation status.

(G) Co-IP of Flag-HIF1 $\alpha$  (WT or mutants) and HA-PHD2 in 293T cell lysate with epitope-tagged protein expression. MG132 (10  $\mu$ M) was added to prevent HIF1 $\alpha$  degradation.

Data shown are mean  $\pm$  SD from biological triplicates.

**A**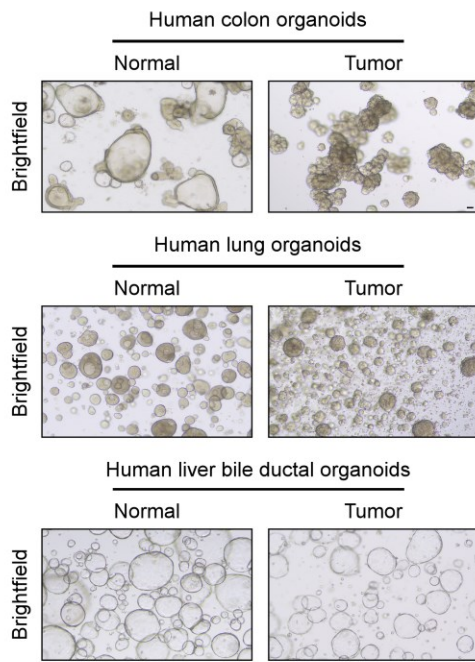**B**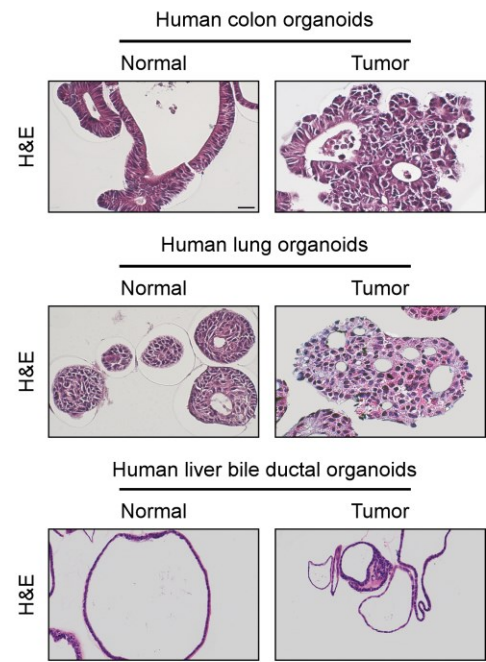**C**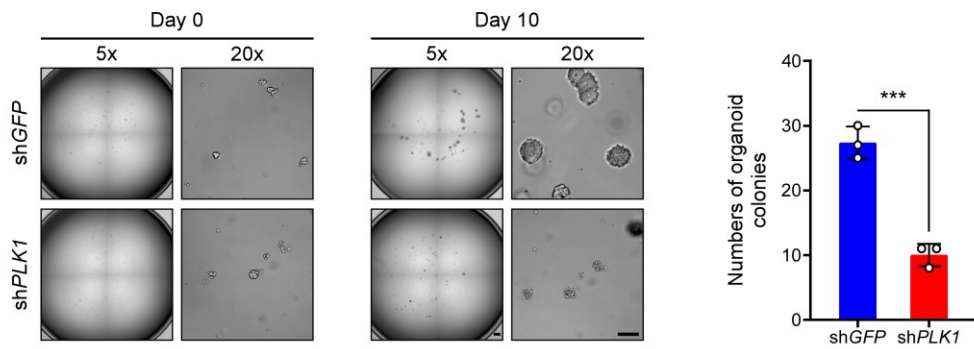**D**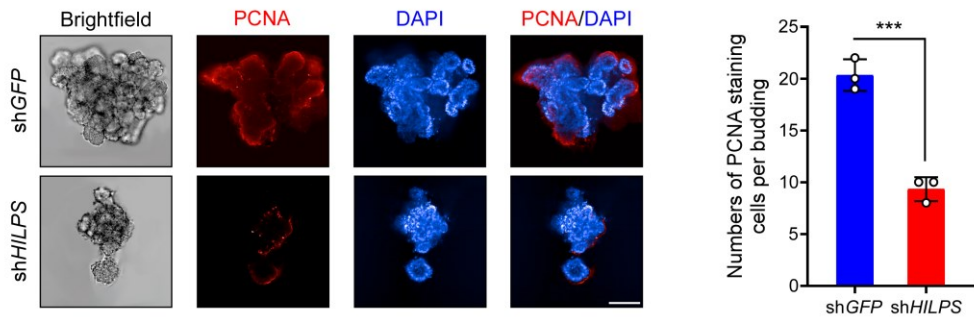**E**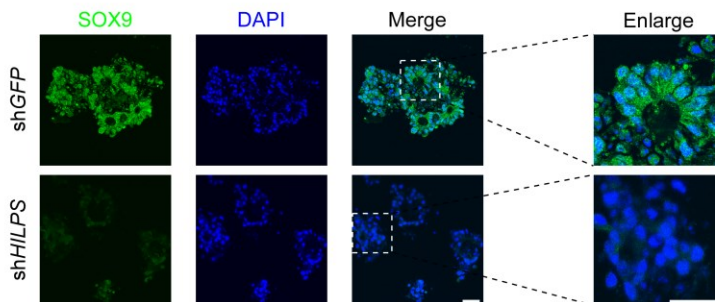

**Figure S6. *HILPS* depletion impairs human colorectal cancer organoid oncogenicity, related to Figure 7.**

(A and B) Representative images showing the morphology (A) and hematoxylin-eosin (H&E) staining (B) of indicated human organoids. Scale bar, 50  $\mu\text{m}$ .

(C) Representative bright field images of *PLK1*-depleted colorectal cancer organoids cultured under 1%  $\text{O}_2$  at indicated days (left). Scale bar, 200  $\mu\text{m}$ . Quantitation of viable organoid colonies are shown on the right.

(D) Representative images showing brightfield view and immunofluorescence staining of PCNA in *HILPS*-depleted colorectal cancer organoids cultured under 1%  $\text{O}_2$  (left). DAPI was stained to visualize the organoids in dark field. Scale bar, 200  $\mu\text{m}$ . Quantitation of PCNA positive staining cells per budding are presented (right).

(E) Immunofluorescence staining of SOX9 of human colorectal cancer organoids with or without *HILPS* depletion and exposed to 1%  $\text{O}_2$ . Scale bar, 100  $\mu\text{m}$ .

Data shown are mean  $\pm$  SD from biological triplicates. \* $p < 0.05$ , \*\* $p < 0.01$ , \*\*\* $p < 0.001$ , n.s., no significance, unpaired two-tailed Student's t test.

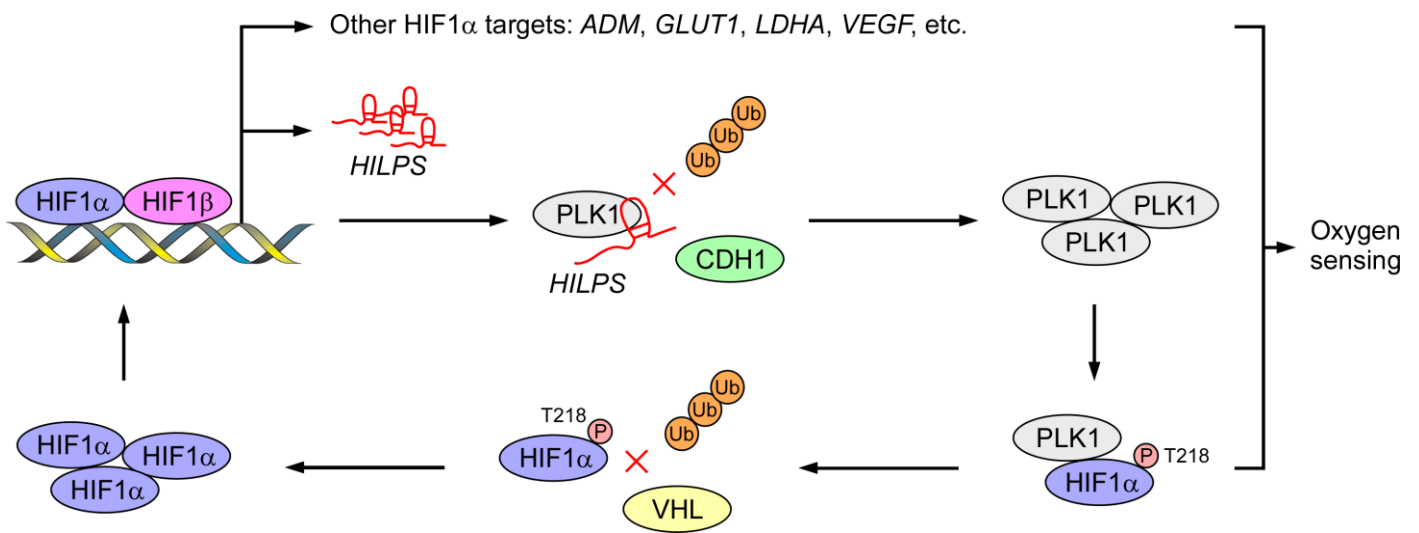

**Figure S7. Model depicting a feed-forward circuit between *HILPS*, PLK1 and HIF1α for oxygen sensing in human.**

HIF1α directly activates *HILPS* transcription. The accumulated *HILPS* sequesters PLK1 from its E3 ligase CDH1, promoting PLK1 stabilization. Stabilized PLK1 phosphorylates HIF1α at T218, preventing it from VHL-mediated protein degradation. The regulatory circuit of *HILPS*-PLK1-HIF1α strengthens the oxygen-sensing mechanism mediated by HIF1α in human cells. See discussion for more details.

**Table S1. List of primers and oligonucleotides used in this study.**

| <b>Primers for Real-time qPCR</b>      |                          |
|----------------------------------------|--------------------------|
| <i>ACTIN</i> forward                   | CATGTACGTTGCTATCCAGGC    |
| <i>ACTIN</i> reverse                   | CTCCTTAATGTCACGCACGAT    |
| <i>NONHSAT190942.1</i> forward         | AGTCTTCCCTGAAATGTACCTGA  |
| <i>NONHSAT190942.1</i> reverse         | GCACCAGAAGACGAAGGACA     |
| <i>ENST00000429588</i> forward         | AGTCTTCCCTGAAATGTACCTGA  |
| <i>ENST00000429588</i> reverse         | TTCCACCAACAGACCATCCG     |
| <i>HILPS</i> forward                   | AAGAATTTCCGCCCTTCGT      |
| <i>HILPS</i> reverse                   | TCCACACCAGATTCCTTCGC     |
| <i>HIF1<math>\alpha</math></i> forward | GAAGACATCGCGGGGAC        |
| <i>HIF1<math>\alpha</math></i> reverse | TGGCTGCATCTCGAGACTTT     |
| <i>HIF1<math>\beta</math></i> forward  | CTGCCAACCCCGAAATGACAT    |
| <i>HIF1<math>\beta</math></i> reverse  | CGCCGCTTAATAGCCCTCTG     |
| <i>NANOG</i> forward                   | CCCCAGCCTTTACTCTTCCTA    |
| <i>NANOG</i> reverse                   | CCAGGTTGAATTGTTCCAGGTC   |
| <i>OCT4</i> forward                    | CAAAGCAGAAACCCTCGTGC     |
| <i>OCT4</i> reverse                    | TCTCACTCGGTTCTCGATACTG   |
| <i>SOX2</i> forward                    | GTCATTGCTGTGGGTGATG      |
| <i>SOX2</i> reverse                    | AGAAAAACGAGGGAAATGGG     |
| <i>PAX6</i> forward                    | TCCGTTGGAAGTATGGAGT      |
| <i>PAX6</i> reverse                    | GTTGGTATCCGGGGACTTC      |
| <i>SOX1</i> forward                    | ATTATTTTGCCCGTTTTCCC     |
| <i>SOX1</i> reverse                    | TCAAGGAAACACAATCGCTG     |
| <i>FOX2A</i> forward                   | GGAGCAGCTACTATGCAGAGC    |
| <i>FOX2A</i> reverse                   | CGTGTTTCATGCCGTTTCATCC   |
| <i>SOX17</i> forward                   | GCATGACTCCGGTGTGAATCT    |
| <i>SOX17</i> reverse                   | TCACACGTCAGGATAGTTGCAGT  |
| <i>MIXL1</i> forward                   | GAGACTTGGCACGCCTGT       |
| <i>MIXL1</i> reverse                   | GGTACCCCGACATCCACTT      |
| <i>TBXT</i> forward                    | GATGATCGTGACCAAGAACGG    |
| <i>TBXT</i> reverse                    | CCACGAAGTCCAGCAGGAA      |
| <i>GATA6</i> forward                   | AGTTCCTACGCTTCGCATCCCTTC |
| <i>GATA6</i> reverse                   | TGAACAGCAGCAAGTCCTCCCA   |
| <i>PLK1</i> forward                    | TGTTAGTGGGCAAACCACCT     |
| <i>PLK1</i> reverse                    | CAGCTCGTTAATGGTTGGGC     |
| <i>ADM</i> forward                     | ATGAAGCTGGTTTCCGTCG      |
| <i>ADM</i> reverse                     | GACATCCGCAGTTCCTCTT      |
| <i>GLUT1</i> forward                   | GGCCAAGAGTGTGCTAAAGAA    |
| <i>GLUT1</i> reverse                   | ACAGCGTTGATGCCAGACAG     |
| <i>HK2</i> forward                     | GAGCCACCACTCACCCTACT     |
| <i>HK2</i> reverse                     | CCAGGCATTCCGGCAATGTG     |
| <i>LDHA</i> forward                    | ATGGCAACTCTAAAGGATCAGC   |

|                              |                              |
|------------------------------|------------------------------|
| <i>LDHA</i> reverse          | CCAACCCCAACAACCTGTAATCT      |
| <i>PDK1</i> forward          | CTGTGATACGGATCAGAAACCG       |
| <i>PDK1</i> reverse          | TCCACCAAACAATAAAGAGTGCT      |
| <i>VEGF</i> forward          | AGGGCAGAATCATCACGAAGT        |
| <i>VEGF</i> reverse          | AGGGTCTCGATTGGATGGCA         |
| <b>Primers for ChIP-qPCR</b> |                              |
| <i>HRE1</i> forward          | CTCAGCTCTGGCCTCTGAGT         |
| <i>HRE1</i> reverse          | GCTGAGCTCCGTTAGTCACC         |
| <i>HRE2</i> forward          | AAAACCCAGCTCTTTGGTCA         |
| <i>HRE2</i> reverse          | ATGATCCTCCCACCTTAGCC         |
| <b>shRNA sequences</b>       |                              |
| shGFP                        | TACAACAGCCACAACGTCTAT        |
| shHILPS#1                    | GGGCTCTGGTTGGTGTTTAAA        |
| shHILPS#2                    | ATTCGGAAGCATCTGTAAAT         |
| shHIF1 $\alpha$              | GTGATGAAAGAATTACCGAAT        |
| shHIF1 $\beta$               | GAGAAGTCAGATGGTTTATT         |
| shCDH1                       | AGAAGGGTCTGTTACGTATT         |
| shPLK1#1                     | CGATACTACCTACGGCAAAT         |
| shPLK1#2                     | CGCCTCATCCTCTACAATGAT        |
| <b>Primers for RACE</b>      |                              |
| 5' RACE GSP                  | TGTGCTGTCTTTCTGTCCTTCACCGTCC |
| 3' RACE GSP                  | TCGGATGGTCTGTTGGTGAATGTGGAG  |
| 5' RACE Nested PCR           | TGTCCTTCACCGTCCCATTGCCAG     |
| 3' RACE Nested PCR           | GTGGAGCTGGACGGGTCAAGGAGCAC   |

**Table S2. List of primary antibodies used in this study.**

| <b>Antibodies</b>             | <b>Source</b>             | <b>Identifier</b>                 |
|-------------------------------|---------------------------|-----------------------------------|
| $\beta$ -Actin                | ABclonal                  | Cat# AC026; RRID: AB_2768234      |
| NANOG                         | ABclonal                  | Cat# A3232; RRID: AB_2765000      |
| OCT4                          | Cell Signaling Technology | Cat# 2750; RRID: AB_823583        |
| SOX2                          | Cell Signaling Technology | Cat# 3579; RRID: AB_2195767       |
| HA-tag                        | ABclonal                  | Cat# AE008; RRID: AB_2770404      |
| HA-tag (peroxidase conjugate) | Roche                     | Cat# 12013819001; RRID: AB_390917 |
| GST-tag                       | ABclonal                  | Cat# AE001; RRID: AB_2770403      |
| PLK1                          | Cell Signaling Technology | Cat# 4513; RRID: AB_2167409       |
| Myc-tag                       | ABclonal                  | Cat# AE010; RRID: AB_2770408      |
| CDH1                          | CUSABIO                   | Cat# CSB-PA892473LA01HU           |
| Flag-tag                      | Sigma-Aldrich             | Cat# F1804; RRID: AB_262044       |

|                       |                              |                               |
|-----------------------|------------------------------|-------------------------------|
| HIF1 $\alpha$         | Cell Signaling<br>Technology | Cat# 14179; RRID: AB_2622225  |
| HIF2 $\alpha$         | Cell Signaling<br>Technology | Cat# 59973; RRID: AB_2799579  |
| $\beta$ -Tubulin      | ABclonal                     | Cat# AC021; RRID: AB_2773004  |
| Rabbit<br>control IgG | ABclonal                     | Cat# AC005; RRID: AB_2771930  |
| Ki67                  | BD Biosciences               | Cat# 550609; RRID: AB_393778  |
| PCNA                  | Abcam                        | Cat# ab29; RRID: AB_303394    |
| SOX9                  | Millipore                    | Cat# AB5535; RRID: AB_2239761 |
